# Supplementary material
Source: publisher figshare collection journal article supplement (https://gsapubs.figshare.com/articles/dataset/_/12573995)
Supplement: Supplementary file 1 [file 2]

## Supplementary Information for: “Calcareous nannofossils anchor chronologies for Arctic Ocean sediments back to 500 ka”

Matt O'Regan<sup>1</sup>, Jan Backman<sup>1</sup>, Eliana Fornaciari<sup>2</sup>, Martin Jakobsson<sup>1</sup> and Gabriel West<sup>1</sup>

<sup>1</sup>Department of Geological Sciences, Stockholm University, Stockholm, SE-106 91, Sweden

<sup>2</sup> Department of Geoscience, University of Padova, Italy

### Supplementary Figure

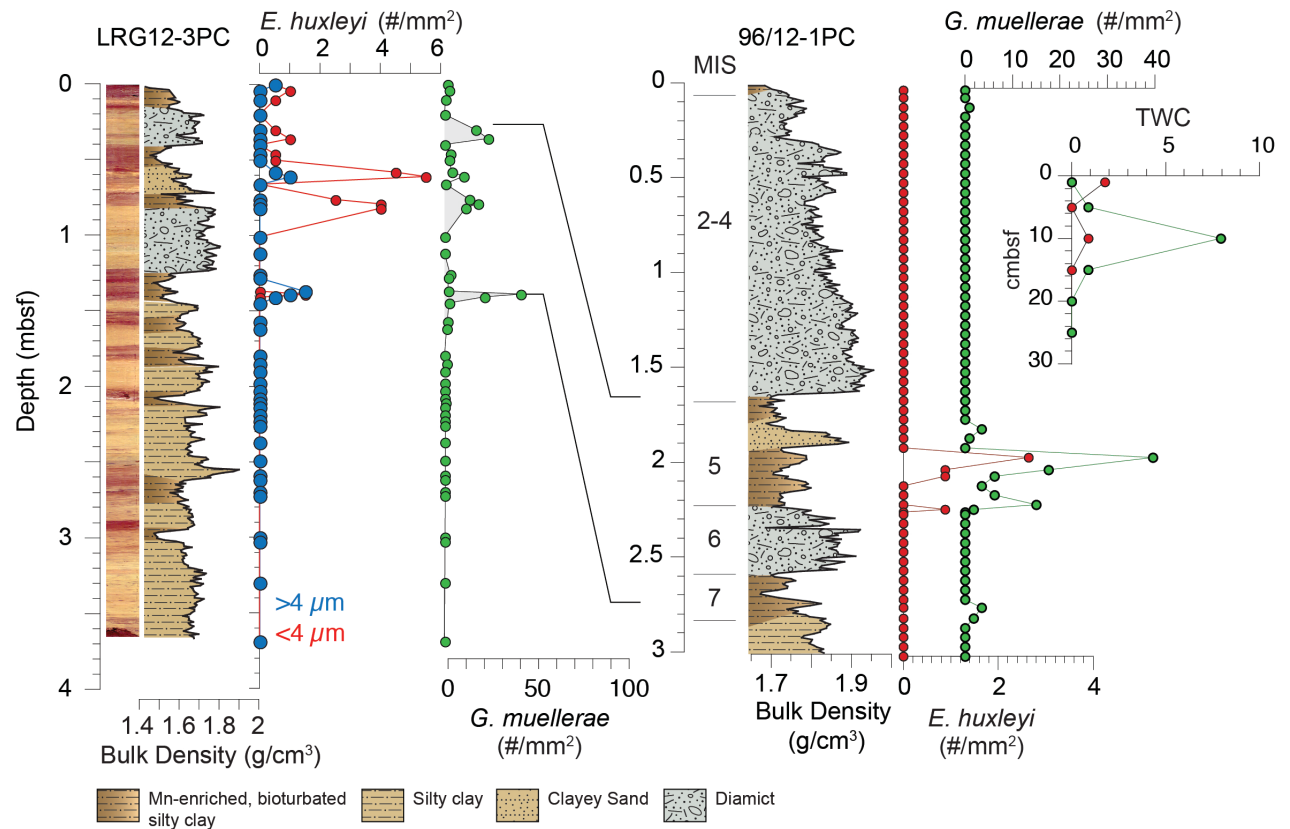

**Figure S1.** Comparison of generalized lithology and abundances of *E. huxleyi* and *G. muelleriae* in core LRG12-3PC and the previously published record from A096/12-1PC (Jakobsson et al., 2001). The MIS boundaries proposed by Jakobsson et al (2001) are shown. Both records contain *E. huxleyi* and *G. muelleriae* in stratigraphically equivalent interval dated to MIS 5, but only LRG12-3PC has *E. huxleyi* in MIS 7. Therefore, our new records support the placement of MIS 5 proposed by Jakobsson et al. (2001), but illustrate that *E. huxleyi* existed in the Arctic during MIS 7 (shortly after its global evolution in MIS 8). It was simply not present in the low abundance MIS 7 assemblage found in A096/12-1PC. The inset displays abundances of *E. huxleyi* and *G. muelleriae* in the trigger weight core (TWC) of 96/12-1PC that recovered Holocene material missing in the longer piston core.

## Caption

**Table SI:** Number of calcareous nannofossil specimens found in samples from LRG12-3PC. Each sample was scanned using 100 fields of view at 1600X magnification. To convert the numbers of specimens found to specimens/mm<sup>2</sup>, these numbers should be multiplied by 0.5. VSG = very small *Gephyrocapsa* ( $\leq 2$   $\mu\text{m}$ ). Relative abundances of Detrital Carbonate (DC), R=Rare ( $<1$  % of total sediment particles), F=Few (1-10 %), C=Common (10-50 %), A=Abundant ( $>50$  %).

## Methods

**Photomicrographs:** Images were acquired using a MicroPublisher 3.3 Real Time View (RTV) camera by Teledyne Imaging. The camera sensor has a 3.3-million-pixel sensor. The captured images were post-processed in Photoshop where a shake reduction filter was applied followed by adjustment of the image tone curve in order to bring forward details.

**Taxonomic Notes:** On the basis of biometric subdivisions, we distinguished within *E. huxleyi* and the *Gephyrocapsa* spp. group, the following morphotypes:

- *E. huxleyi*  $\leq 4$   $\mu\text{m}$  and *E. huxleyi*  $\geq 4$   $\mu\text{m}$  are separated into two categories following Colmenero-Hidalgo et al. (2002).
- *Gephyrocapsids*  $< 2$   $\mu\text{m}$  are referred to as very small *Gephyrocapsa* spp. (VSG).
- *Gephyrocapsids* having an open central area and a distal shield length  $> 3$   $\mu\text{m}$  are referred to as *Gephyrocapsa muelleri*.
- *Gephyrocapsids* with a distinct bridge, but an almost closed central area and a distal shield length  $> 3$   $\mu\text{m}$  are referred to as *Gephyrocapsa caribbeanica*.
- *Pseudoemiliania lacunosa* is referred to the elliptical morphotype with size ranging from 4  $\mu\text{m}$  to 6.5  $\mu\text{m}$  following de Kaenel et al (1999; *P. lacunosa* var. *ovata*).

## References

- Colmenero-Hidalgo, E., Flores, J.-A., and Sierro, F.J., 2002, Biometry of *Emiliania huxleyi* and its biostratigraphic significance in the Eastern North Atlantic Ocean and Western Mediterranean Sea in the last 20 000 years: Marine Micropaleontology, v. 46, p. 247-263.
- de Kaenel, E., Siesser, W.G., and Murat, A., 1999, Pleistocene calcareous nannofossil biostratigraphy and the western Mediterranean sapropels, Sites 974 to 977 and 979, in Zahn, R., Comas, M.C., and Klaus, A., eds., Proceedings of the Ocean Drilling Program, Scientific Results, Leg 161: College Station, Texas (Ocean Drilling Program), 159–183. doi:10.2973/odp.proc.sr.161.250.1999
- Jakobsson, M., Løvlie, R., Arnold, E.M., Backman, J., Polyak, L., Knutsen, J.O., and Musatov, E., 2001, Pleistocene stratigraphy and paleoenvironmental variation from Lomonosov Ridge sediments, central Arctic Ocean: Global Planetary Change, 31, 1-22.
